# Supplementary material for: Serum Metabolites Responding in a Dose-Dependent Manner to the Intake of a High-Fat Meal in Normal Weight Healthy Men Are Associated with Obesity
Source: MDPI journal article supplement (doi:10.3390/metabo11060392), 2021-06-16
Supplement: s1 [file s1]

# Serum metabolites responding in a dose-dependent manner to the intake of a high-fat meal in normal weight healthy men are associated with obesity

**SUPPLEMENTAL TABLE S1** Characterization of the fasting (t0) and postprandial (iAUC 0-6h) values of NW (n = 15) and OB (n = 17) subjects for the 135 dose-dependent features identified in the NW group after ingestion of 500, 1000, and 1500 kcal of the HF-meal<sup>1</sup>

| No   | Identification                | LI | Rt   | Mass m/z   | Median t0 |      |      |      |      | Median iAUC NW |      |      |      |      | Median iAUC OB |       |       |      |       |      |       |      |       |
|------|-------------------------------|----|------|------------|-----------|------|------|------|------|----------------|------|------|------|------|----------------|-------|-------|------|-------|------|-------|------|-------|
|      |                               |    |      |            | min       | Da   | NW   | sem  | OB   | sem            | p    | A    | sem  | B    | sem            | C     | sem   | FDR  | A     | sem  | B     | sem  | C     |
| 66   | No identification             | 4  | 3.36 | 102.046334 | 0.99      | 0.11 | 1.14 | 0.09 | 0.02 | 0.23           | 0.37 | 1.52 | 0.25 | 0.96 | 0.40           | 0.001 | 0.32  | 0.28 | 0.50  | 0.30 | 1.11  | 0.60 | 0.176 |
| 693  | Proline                       | 1  | 1.06 | 116.070699 | 0.76      | 0.06 | 0.90 | 0.07 | 0.07 | 0.47           | 0.16 | 1.61 | 0.17 | 1.68 | 0.21           | 0.000 | 0.12  | 0.15 | 0.68  | 0.15 | 1.05  | 0.20 | 0.013 |
| 781  | Valine                        | 1  | 1.23 | 118.086402 | 0.79      | 0.03 | 0.86 | 0.04 | 0.01 | 0.38           | 0.10 | 1.33 | 0.11 | 1.10 | 0.18           | 0.001 | 0.08  | 0.10 | 0.60  | 0.10 | 0.84  | 0.11 | 0.000 |
| 858  | Homoserine or threonine       | 3  | 0.99 | 120.065394 | 1.11      | 0.09 | 1.27 | 0.06 | 0.01 | 0.47           | 0.24 | 1.88 | 0.13 | 1.74 | 0.19           | 0.000 | 0.24  | 0.23 | 0.02  | 0.20 | 1.34  | 0.29 | 0.021 |
| 867  | No identification             | 4  | 3.36 | 120.080841 | 0.95      | 0.11 | 1.27 | 0.10 | 0.01 | 0.18           | 0.47 | 1.89 | 0.31 | 1.26 | 0.48           | 0.000 | 0.59  | 0.34 | 0.54  | 0.28 | 1.64  | 0.65 | 0.126 |
| 1006 | 2-Hydroxybenzaldehyde         | 2  | 1.26 | 123.043976 | 0.99      | 0.03 | 1.21 | 0.03 | 0.00 | -0.06          | 0.12 | 0.72 | 0.17 | 1.01 | 0.15           | 0.000 | -0.17 | 0.12 | 0.12  | 0.14 | 0.69  | 0.15 | 0.000 |
| 1419 | (2E,4E)-Hexa-2,4-dienoic acid | 2  | 0.85 | 130.086113 | 0.95      | 0.09 | 1.32 | 0.07 | 0.01 | 1.05           | 0.31 | 2.57 | 0.30 | 2.57 | 0.37           | 0.000 | 0.92  | 0.23 | 1.35  | 0.26 | 2.35  | 0.43 | 0.120 |
| 1474 | No identification             | 4  | 3.36 | 131.049007 | 1.19      | 0.12 | 1.51 | 0.09 | 0.06 | 0.60           | 0.30 | 1.53 | 0.26 | 1.28 | 0.44           | 0.000 | 0.40  | 0.28 | 0.29  | 0.23 | 1.84  | 0.54 | 0.133 |
| 1544 | Creatine                      | 1  | 1.04 | 132.077166 | 0.43      | 0.04 | 0.74 | 0.10 | 0.00 | 1.86           | 0.15 | 2.99 | 0.29 | 3.97 | 0.40           | 0.000 | 1.65  | 0.28 | 3.28  | 0.31 | 4.45  | 0.41 | 0.000 |
| 1551 | Triethanolamine               | 2  | 1.25 | 132.102095 | 0.67      | 0.04 | 0.75 | 0.04 | 0.21 | 1.16           | 0.16 | 1.68 | 0.20 | 1.94 | 0.30           | 0.000 | 0.45  | 0.13 | 1.17  | 0.17 | 1.45  | 0.17 | 0.000 |
| 1558 | No identification             | 4  | 1.26 | 132.168815 | 0.60      | 0.07 | 0.69 | 0.08 | 0.25 | 0.07           | 0.38 | 1.84 | 0.56 | 2.66 | 0.51           | 0.001 | 0.28  | 0.43 | 1.03  | 0.44 | 1.77  | 0.58 | 0.100 |
| 1588 | No identification             | 4  | 1.26 | 133.031737 | 0.91      | 0.03 | 1.00 | 0.03 | 0.25 | 0.07           | 0.14 | 1.48 | 0.18 | 1.89 | 0.18           | 0.000 | 0.00  | 0.10 | 0.35  | 0.11 | 0.84  | 0.19 | 0.000 |
| 1659 | Alanine                       | 1  | 0.97 | 134.018646 | 0.95      | 0.06 | 1.23 | 0.05 | 0.02 | -0.28          | 0.25 | 0.36 | 0.15 | 0.69 | 0.22           | 0.003 | -0.20 | 0.22 | -0.14 | 0.23 | -0.01 | 0.21 | 0.569 |
| 1797 | Benzofuran                    | 2  | 1.26 | 136.075706 | 0.97      | 0.03 | 1.17 | 0.04 | 0.00 | 0.04           | 0.15 | 0.75 | 0.16 | 0.98 | 0.15           | 0.000 | -0.19 | 0.13 | 0.32  | 0.15 | 0.64  | 0.15 | 0.000 |
| 2518 | Phenylpropionic acid          | 2  | 1.26 | 147.044001 | 1.01      | 0.04 | 1.19 | 0.04 | 0.00 | -0.12          | 0.14 | 1.08 | 0.17 | 0.84 | 0.17           | 0.000 | -0.20 | 0.17 | 0.28  | 0.15 | 0.43  | 0.14 | 0.000 |
| 2548 | Lysine                        | 1  | 0.86 | 147.112601 | 0.97      | 0.09 | 1.30 | 0.07 | 0.00 | 0.84           | 0.35 | 2.63 | 0.31 | 2.62 | 0.39           | 0.000 | 0.96  | 0.23 | 1.14  | 0.25 | 2.48  | 0.40 | 0.070 |
| 2694 | No identification             | 4  | 0.95 | 149.992845 | 1.70      | 0.20 | 1.76 | 0.15 | 0.33 | -1.48          | 0.98 | 0.69 | 0.50 | 1.73 | 0.53           | 0.000 | -0.25 | 0.41 | -0.50 | 0.64 | -0.32 | 0.43 | 0.235 |
| 2696 | No identification             | 4  | 0.95 | 150.013489 | 1.17      | 0.09 | 1.21 | 0.05 | 0.24 | 0.57           | 0.37 | 1.47 | 0.19 | 1.71 | 0.23           | 0.001 | 0.55  | 0.18 | 0.29  | 0.22 | 0.90  | 0.27 | 0.068 |
| 2704 | No identification             | 4  | 1.26 | 150.058349 | 0.87      | 0.03 | 0.94 | 0.03 | 0.50 | 0.26           | 0.14 | 1.68 | 0.19 | 2.28 | 0.18           | 0.000 | 0.05  | 0.11 | 0.51  | 0.12 | 0.98  | 0.20 | 0.000 |
| 2960 | 2,3-Butanediol                | 2  | 2.42 | 154.083594 | 0.74      | 0.09 | 0.96 | 0.08 | 0.00 | -0.10          | 0.53 | 1.97 | 0.28 | 2.52 | 0.22           | 0.000 | 0.84  | 0.30 | 1.10  | 0.33 | 1.41  | 0.37 | 0.516 |
| 2961 | No identification             | 4  | 1.25 | 154.083752 | 0.69      | 0.04 | 0.70 | 0.05 | 0.47 | 0.75           | 0.15 | 1.57 | 0.15 | 1.63 | 0.22           | 0.000 | 0.51  | 0.11 | 0.66  | 0.12 | 0.98  | 0.17 | 0.049 |
| 3575 | No identification             | 4  | 0.97 | 164.028974 | 0.94      | 0.06 | 0.99 | 0.04 | 0.14 | 0.18           | 0.19 | 1.67 | 0.21 | 1.53 | 0.17           | 0.000 | 0.31  | 0.18 | 0.45  | 0.17 | 0.70  | 0.15 | 0.183 |
| 3632 | No identification             | 4  | 1.26 | 165.054484 | 1.06      | 0.04 | 1.24 | 0.04 | 0.02 | -0.09          | 0.17 | 0.70 | 0.15 | 1.14 | 0.17           | 0.000 | -0.16 | 0.13 | 0.24  | 0.17 | 0.54  | 0.15 | 0.000 |
| 3681 | Gentiatibetine                | 2  | 3.36 | 166.086114 | 0.96      | 0.12 | 1.26 | 0.10 | 0.02 | 0.45           | 0.49 | 1.76 | 0.30 | 1.32 | 0.49           | 0.000 | 0.54  | 0.34 | 0.45  | 0.27 | 1.81  | 0.65 | 0.112 |
| 3708 | No identification             | 4  | 3.36 | 166.161719 | 0.99      | 0.09 | 1.09 | 0.09 | 0.08 | 0.24           | 0.37 | 1.25 | 0.28 | 1.47 | 0.52           | 0.000 | 0.85  | 0.59 | 0.31  | 0.38 | 0.09  | 0.59 | 0.722 |
| 3852 | No identification             | 4  | 3.36 | 168.091325 | 1.05      | 0.11 | 1.30 | 0.11 | 0.01 | -0.35          | 0.44 | 1.47 | 0.22 | 0.85 | 0.41           | 0.001 | 0.34  | 0.33 | -0.03 | 0.26 | 1.10  | 0.54 | 0.153 |
| 3902 | No identification             | 4  | 0.90 | 169.094326 | 0.97      | 0.08 | 1.25 | 0.09 | 0.01 | 0.69           | 0.30 | 2.27 | 0.30 | 2.85 | 0.31           | 0.000 | 0.80  | 0.34 | 1.05  | 0.21 | 2.56  | 0.42 | 0.059 |
| 4189 | Glutamic gamma-semialdehyde   | 2  | 1.16 | 173.091622 | 0.44      | 0.05 | 0.50 | 0.05 | 0.14 | 2.08           | 0.28 | 4.12 | 0.65 | 4.41 | 0.98           | 0.000 | 1.39  | 0.49 | 3.14  | 0.41 | 3.94  | 0.60 | 0.000 |
| 4310 | N-Tigloylglycine              | 2  | 1.13 | 175.107448 | 0.50      | 0.31 | 0.50 | 0.07 | 0.65 | 0.80           | 0.08 | 1.44 | 0.33 | 2.45 | 0.29           | 0.000 | 0.87  | 0.09 | 1.47  | 0.19 | 1.83  | 0.21 | 0.000 |
| 4315 | Arginine                      | 1  | 0.95 | 175.118639 | 0.95      | 0.08 | 1.31 | 0.07 | 0.00 | 0.62           | 0.28 | 2.18 | 0.30 | 2.39 | 0.24           | 0.000 | 1.06  | 0.19 | 0.63  | 0.23 | 2.16  | 0.36 | 0.010 |
| 4389 | Asparagine                    | 2  | 0.95 | 177.024234 | 1.16      | 0.07 | 1.16 | 0.04 | 0.81 | 0.48           | 0.32 | 1.23 | 0.19 | 1.59 | 0.24           | 0.000 | 0.39  | 0.15 | -0.20 | 0.21 | 0.58  | 0.27 | 0.299 |
| 4408 | Ornithine                     | 2  | 0.90 | 177.060617 | 1.08      | 0.07 | 1.17 | 0.06 | 0.07 | 1.04           | 0.29 | 2.49 | 0.29 | 2.22 | 0.31           | 0.000 | 1.08  | 0.16 | 1.12  | 0.15 | 2.02  | 0.38 | 0.089 |
| 4671 | No identification             | 4  | 3.46 | 181.095883 | 0.60      | 0.04 | 0.56 | 0.03 | 0.72 | -0.27          | 0.20 | 0.52 | 0.12 | 0.63 | 0.15           | 0.000 | 0.46  | 0.16 | 0.12  | 0.13 | 0.61  | 0.16 | 0.398 |
| 4740 | Tyrosine                      | 2  | 1.26 | 182.081165 | 0.98      | 0.04 | 1.19 | 0.04 | 0.00 | -0.07          | 0.15 | 1.11 | 0.17 | 1.59 | 0.19           | 0.000 | -0.17 | 0.16 | 0.40  | 0.15 | 0.68  | 0.15 | 0.000 |
| 4747 | No identification             | 4  | 1.25 | 182.105562 | 0.54      | 0.03 | 0.61 | 0.04 | 0.35 | 1.22           | 0.14 | 1.81 | 0.20 | 2.07 | 0.23           | 0.000 | 0.46  | 0.14 | 1.30  | 0.14 | 1.67  | 0.17 | 0.000 |
| 4896 | A alpha C                     | 2  | 2.29 | 184.085796 | 0.80      | 0.08 | 1.06 | 0.09 | 0.00 | -0.88          | 0.41 | 1.23 | 0.22 | 2.13 | 0.34           | 0.000 | 0.28  | 0.36 | 0.48  | 0.40 | 0.67  | 0.50 | 0.244 |
| 5270 | Homoarginine                  | 1  | 0.97 | 189.134128 | 1.03      | 0.10 | 1.32 | 0.11 | 0.04 | -0.07          | 0.20 | 0.85 | 0.37 | 0.84 | 0.14           | 0.000 | 0.23  | 0.22 | -0.31 | 0.34 | 0.04  | 0.31 | 0.265 |

| No    | Identification                                                                 | LI | Rt   | Mass m/z   | Median t0 |      |      |      |      | Median iAUC NW |      |       |      |       | Median iAUC OB |       |       |      |       |      |       |      |       |
|-------|--------------------------------------------------------------------------------|----|------|------------|-----------|------|------|------|------|----------------|------|-------|------|-------|----------------|-------|-------|------|-------|------|-------|------|-------|
|       |                                                                                |    | min  | Da         | NW        | sem  | OB   | sem  | p    | A              | sem  | B     | sem  | C     | sem            | FDR   | A     | sem  | B     | sem  | C     | sem  | FDR   |
| 6278  | Cys-Asp-Arg                                                                    | 2  | 13.2 | 205.595142 | 0.41      | 0.07 | 0.39 | 0.07 | 0.88 | 2.61           | 0.43 | 4.70  | 0.39 | 4.44  | 0.60           | 0.003 | 1.14  | 0.34 | 3.00  | 0.31 | 3.01  | 0.47 | 0.000 |
| 6369  | 2-Methylcitric acid                                                            | 2  | 0.88 | 207.050182 | 1.12      | 0.12 | 1.56 | 0.13 | 0.00 | 0.24           | 0.70 | 4.13  | 0.66 | 3.47  | 0.51           | 0.001 | 0.85  | 0.53 | 1.68  | 0.70 | 1.41  | 0.78 | 0.746 |
| 6672  | Dihydroxyfumaric acid                                                          | 2  | 1.04 | 212.016811 | 0.53      | 0.06 | 0.80 | 0.10 | 0.02 | 1.87           | 0.20 | 3.31  | 0.39 | 4.41  | 0.41           | 0.000 | 1.38  | 0.30 | 3.54  | 0.31 | 4.34  | 0.40 | 0.000 |
| 6833  | Met-Gln-Lys                                                                    | 2  | 13.2 | 214.60049  | 0.35      | 0.07 | 0.25 | 0.08 | 0.24 | 3.14           | 0.42 | 6.24  | 0.72 | 4.53  | 0.82           | 0.000 | 1.50  | 0.30 | 3.69  | 0.50 | 3.48  | 0.48 | 0.000 |
| 6992  | 1-4 Benzo-quinone                                                              | 2  | 0.86 | 217.049101 | 0.91      | 0.06 | 1.00 | 0.05 | 0.29 | 0.97           | 0.40 | 2.47  | 0.29 | 2.93  | 0.22           | 0.000 | 0.84  | 0.27 | 1.70  | 0.31 | 1.63  | 0.32 | 0.129 |
| 7084  | 2-(2-Butoxyethoxy) acetic acid                                                 | 2  | 2.80 | 218.138199 | 0.83      | 0.07 | 0.93 | 0.09 | 0.14 | 0.00           | 0.39 | 1.43  | 0.27 | 1.24  | 0.37           | 0.000 | 0.52  | 0.38 | 0.38  | 0.30 | 1.33  | 0.52 | 0.249 |
| 7137  | 1-(2-Thienyl)-1-heptanone                                                      | 2  | 0.95 | 219.082367 | 0.95      | 0.07 | 1.29 | 0.07 | 0.00 | 0.58           | 0.28 | 2.15  | 0.30 | 1.96  | 0.17           | 0.000 | 0.95  | 0.19 | 0.54  | 0.22 | 1.65  | 0.33 | 0.019 |
| 7141  | Glu-Ala                                                                        | 2  | 1.25 | 219.097095 | 0.93      | 0.07 | 1.17 | 0.05 | 0.05 | -0.24          | 0.19 | 0.65  | 0.21 | 0.97  | 0.27           | 0.000 | -0.28 | 0.21 | -0.12 | 0.13 | 0.54  | 0.25 | 0.114 |
| 7796  | N,N'-Diallyl-2,3-dihydroxysuccinamide                                          | 2  | 1.19 | 229.117813 | 0.73      | 0.07 | 0.65 | 0.11 | 0.26 | 0.87           | 0.23 | 1.40  | 0.30 | 1.35  | 0.26           | 0.000 | 0.56  | 0.22 | 1.38  | 0.62 | 1.49  | 0.34 | 0.000 |
| 7876  | Coriandrin                                                                     | 2  | 0.86 | 231.064696 | 0.85      | 0.07 | 1.14 | 0.07 | 0.01 | 0.67           | 0.30 | 2.26  | 0.26 | 2.05  | 0.29           | 0.000 | 0.44  | 0.17 | 1.27  | 0.25 | 1.67  | 0.37 | 0.053 |
| 7904  | No identification                                                              | 4  | 1.02 | 231.14461  | 0.86      | 0.06 | 0.73 | 0.06 | 0.63 | 0.46           | 0.22 | 2.37  | 0.30 | 2.16  | 0.23           | 0.000 | 0.86  | 0.24 | 1.15  | 0.19 | 1.12  | 0.24 | 0.593 |
| 7980  | No identification                                                              | 4  | 1.06 | 232.950335 | 1.14      | 0.05 | 1.03 | 0.06 | 0.16 | -0.13          | 0.23 | -0.46 | 0.30 | -1.09 | 0.23           | 0.001 | -0.21 | 0.29 | 0.56  | 0.31 | -0.12 | 0.32 | 0.171 |
| 8278  | Salithion                                                                      | 2  | 1.06 | 238.991147 | 0.70      | 0.09 | 0.61 | 0.11 | 0.58 | 1.29           | 5.51 | 3.35  | 0.39 | 2.92  | 0.30           | 0.000 | 0.74  | 0.53 | 2.45  | 0.28 | 2.82  | 0.96 | 0.020 |
| 8282  | 2,3-Naphtalendicarboxylic acid                                                 | 2  | 0.88 | 239.030961 | 0.80      | 0.07 | 0.92 | 0.07 | 0.86 | 1.14           | 0.36 | 1.97  | 0.29 | 3.14  | 0.35           | 0.002 | 0.81  | 0.31 | 1.68  | 0.31 | 1.31  | 0.35 | 0.288 |
| 8488  | Tetramethyluric acid                                                           | 2  | 1.04 | 242.12423  | 0.91      | 0.14 | 0.74 | 0.09 | 0.63 | 0.54           | 0.39 | 1.55  | 0.22 | 1.92  | 0.57           | 0.004 | 0.19  | 0.34 | 0.10  | 0.25 | 0.80  | 0.26 | 0.761 |
| 8719  | Isobutyl octanoate                                                             | 2  | 3.10 | 245.149088 | 0.90      | 0.10 | 0.94 | 0.08 | 0.50 | 0.38           | 0.47 | 2.00  | 0.32 | 1.63  | 0.44           | 0.000 | 0.62  | 0.34 | 1.50  | 0.49 | 1.97  | 0.61 | 0.046 |
| 8826  | No identification                                                              | 4  | 3.22 | 247.128294 | 0.95      | 0.08 | 1.25 | 0.09 | 0.00 | -0.37          | 0.34 | 1.85  | 0.19 | 1.32  | 0.29           | 0.000 | 0.30  | 0.28 | 0.31  | 0.23 | 1.15  | 0.39 | 0.086 |
| 8923  | Creatinine                                                                     | 2  | 1.18 | 249.107463 | 0.84      | 0.05 | 0.91 | 0.05 | 0.41 | 0.20           | 0.12 | 0.99  | 0.20 | 0.97  | 0.22           | 0.001 | 0.13  | 0.12 | 0.73  | 0.18 | 0.85  | 0.14 | 0.033 |
| 9144  | Palythazine                                                                    | 2  | 3.08 | 253.117819 | 1.07      | 0.12 | 1.68 | 0.23 | 0.00 | 0.09           | 0.61 | 1.72  | 0.36 | 1.28  | 0.29           | 0.000 | 1.00  | 0.34 | 0.03  | 0.48 | 1.32  | 0.70 | 0.205 |
| 9539  | 2-((3-Methyl-5-oxo-4,5-dihydro-1H-pyrazol-4-yl))2-thienyl)methyl)malononitrile | 2  | 0.90 | 259.063581 | 1.09      | 0.09 | 1.54 | 0.09 | 0.00 | 1.14           | 0.47 | 2.54  | 0.49 | 4.07  | 0.36           | 0.000 | 1.00  | 0.35 | 0.80  | 0.30 | 3.08  | 0.55 | 0.035 |
| 9624  | Hexanoylcarnitine                                                              | 2  | 5.95 | 260.185106 | 1.02      | 0.09 | 1.10 | 0.08 | 0.17 | -0.89          | 0.37 | -0.65 | 0.34 | -1.78 | 0.44           | 0.004 | -0.64 | 0.33 | -0.98 | 0.28 | -1.36 | 0.38 | 0.551 |
| 9651  | No identification                                                              | 4  | 9.31 | 260.620872 | 0.00      | 0.05 | 0.00 | 0.15 | 0.79 | 1.81           | 0.97 | 4.63  | 1.03 | 7.08  | 1.46           | 0.000 | 2.74  | 1.35 | 3.83  | 2.39 | 3.96  | 3.03 | 0.012 |
| 9703  | 3-Hydroxydodecanoic acid                                                       | 2  | 4.26 | 261.143884 | 0.84      | 0.05 | 0.98 | 0.07 | 0.00 | 0.84           | 0.16 | 2.33  | 0.22 | 2.88  | 0.38           | 0.000 | 0.77  | 0.30 | 1.35  | 0.23 | 2.29  | 0.33 | 0.000 |
| 9826  | Benzyl-4-methyl-1,3-dihydro-1,4-benzodiazepine                                 | 2  | 1.04 | 263.119707 | 1.07      | 0.11 | 0.95 | 0.07 | 0.95 | -0.04          | 0.47 | 2.02  | 0.36 | 1.70  | 0.50           | 0.005 | 0.79  | 0.47 | 1.34  | 0.33 | 1.81  | 0.47 | 0.217 |
| 9843  | No identification                                                              | 4  | 1.25 | 263.196119 | 0.48      | 0.05 | 0.65 | 0.08 | 0.11 | 1.87           | 0.20 | 2.70  | 0.45 | 4.32  | 0.50           | 0.000 | 1.19  | 0.30 | 2.53  | 0.34 | 3.22  | 0.37 | 0.000 |
| 10249 | No identification                                                              | 4  | 1.04 | 269.975144 | 0.64      | 0.06 | 0.82 | 0.07 | 0.01 | 1.09           | 0.21 | 2.14  | 0.31 | 2.84  | 0.31           | 0.000 | 1.14  | 0.29 | 1.55  | 0.21 | 2.18  | 0.34 | 0.000 |
| 10564 | 3-Mercaptohexyl hexanoate                                                      | 2  | 8.82 | 274.182642 | 0.91      | 0.06 | 1.13 | 0.09 | 0.02 | -0.21          | 0.23 | -0.25 | 0.17 | -1.17 | 0.23           | 0.003 | -0.26 | 0.26 | -0.60 | 0.26 | -1.04 | 0.24 | 0.005 |
| 10669 | Glu-Gln                                                                        | 2  | 1.06 | 276.11839  | 1.15      | 0.09 | 1.23 | 0.09 | 0.35 | -0.24          | 0.32 | 0.68  | 0.35 | 1.40  | 0.28           | 0.000 | 0.24  | 0.25 | -0.15 | 0.26 | -0.22 | 0.42 | 0.616 |
| 10855 | No identification                                                              | 4  | 1.26 | 279.100326 | 0.78      | 0.03 | 0.79 | 0.03 | 0.21 | 0.54           | 0.14 | 1.14  | 0.20 | 1.34  | 0.22           | 0.000 | 0.10  | 0.11 | 0.71  | 0.12 | 0.97  | 0.13 | 0.000 |
| 11346 | No identification                                                              | 4  | 1.25 | 286.114055 | 1.14      | 0.11 | 1.36 | 0.09 | 0.06 | 0.46           | 0.32 | 0.06  | 0.33 | -1.02 | 0.30           | 0.004 | -0.29 | 0.43 | 0.21  | 0.31 | 0.13  | 0.27 | 0.227 |
| 11350 | N-Nonanoyl-homoserine lactone                                                  | 2  | 1.23 | 286.138722 | 0.50      | 0.18 | 0.46 | 0.10 | 0.58 | 0.53           | 0.62 | 3.19  | 0.60 | 3.53  | 0.93           | 0.000 | 1.31  | 0.41 | 1.99  | 0.51 | 2.28  | 0.94 | 0.111 |
| 11353 | Erysopine                                                                      | 2  | 11.3 | 286.143568 | 0.46      | 0.24 | 0.71 | 0.17 | 0.83 | 0.70           | 0.31 | 1.63  | 0.98 | 1.09  | 0.42           | 0.002 | 0.05  | 0.22 | 1.18  | 0.28 | 0.83  | 0.34 | 0.000 |
| 11474 | Cetraxate HCl                                                                  | 2  | 11.2 | 288.159977 | 0.48      | 0.05 | 0.51 | 0.18 | 0.33 | 2.08           | 0.35 | 2.99  | 0.34 | 3.15  | 0.34           | 0.003 | 1.53  | 0.39 | 2.47  | 0.60 | 2.76  | 0.37 | 0.030 |
| 11490 | Valprolycarnitine                                                              | 2  | 7.71 | 288.216447 | 1.00      | 0.15 | 0.98 | 0.12 | 0.43 | -1.24          | 0.57 | -1.60 | 0.59 | -3.00 | 0.81           | 0.002 | -0.84 | 0.55 | -1.51 | 0.50 | -1.35 | 0.68 | 0.357 |
| 12321 | 2,6-Dimethylheptanoyl carnitine                                                | 2  | 8.02 | 302.23198  | 1.01      | 0.19 | 0.55 | 0.09 | 0.14 | -0.93          | 0.53 | -0.37 | 0.60 | -2.69 | 0.58           | 0.003 | -0.51 | 0.18 | -0.53 | 0.20 | -0.69 | 0.22 | 0.838 |
| 12357 | Pyrogallol-2-O-gluconide                                                       | 2  | 3.37 | 303.070362 | 0.14      | 0.06 | 0.08 | 0.04 | 0.21 | 1.41           | 0.40 | 3.49  | 1.02 | 4.20  | 0.86           | 0.000 | 1.87  | 0.37 | 3.73  | 0.63 | 6.25  | 1.08 | 0.000 |
| 12456 | Indole-3-carboxilic acid-O-sulphate                                            | 2  | 4.19 | 305.020622 | 1.13      | 0.08 | 1.40 | 0.08 | 0.00 | -0.01          | 0.46 | 1.96  | 0.37 | 1.61  | 0.35           | 0.000 | 0.56  | 0.32 | -0.31 | 0.34 | 0.85  | 0.53 | 0.055 |
| 12571 | No identification                                                              | 4  | 1.26 | 307.101639 | 1.06      | 0.08 | 1.08 | 0.08 | 0.86 | 0.10           | 0.36 | -0.90 | 0.36 | -1.34 | 0.30           | 0.005 | -0.90 | 0.29 | -1.17 | 0.43 | -1.16 | 0.33 | 0.436 |

| No    | Identification                                                   | LI | Rt   | Mass m/z   | Median t0 |      |      |      |      | Median iAUC NW |      |       |      |       | Median iAUC OB |       |       |      |       |      |       |      |       |
|-------|------------------------------------------------------------------|----|------|------------|-----------|------|------|------|------|----------------|------|-------|------|-------|----------------|-------|-------|------|-------|------|-------|------|-------|
|       |                                                                  |    | min  | Da         | NW        | sem  | OB   | sem  | p    | A              | sem  | B     | sem  | C     | sem            | FDR   | A     | sem  | B     | sem  | C     | sem  | FDR   |
| 12793 | 4-(4-Methanesulfonylphenyl)-3-(4-methylphenyl)-5H-furan-2-one    | 2  | 1.06 | 311.073499 | 0.71      | 0.07 | 0.90 | 0.10 | 0.01 | 0.58           | 0.27 | 2.83  | 0.40 | 3.66  | 0.33           | 0.000 | 0.20  | 0.26 | 0.95  | 0.25 | 2.06  | 0.28 | 0.000 |
| 12804 | 1alpha,15-Dihydroxymaraseme                                      | 2  | 3.51 | 311.123044 | 0.94      | 0.12 | 1.31 | 0.12 | 0.01 | -0.13          | 0.53 | 1.74  | 0.24 | 1.66  | 0.36           | 0.000 | 0.14  | 0.37 | 0.09  | 0.36 | 0.98  | 0.57 | 0.202 |
| 12846 | 20-Dihydrodydrogeterone                                          | 2  | 10.7 | 311.272752 | 0.21      | 0.05 | 0.26 | 0.08 | 0.76 | 3.22           | 0.60 | 3.99  | 0.92 | 5.49  | 0.64           | 0.000 | 2.44  | 0.58 | 4.38  | 1.13 | 5.83  | 1.43 | 0.000 |
| 12879 | 2-trans,4-cis-Decadienoylcarnitine                               | 2  | 8.07 | 312.216353 | 0.99      | 0.12 | 1.01 | 0.10 | 0.72 | -1.48          | 0.41 | -0.88 | 0.49 | -2.40 | 0.51           | 0.004 | -1.20 | 0.43 | -1.29 | 0.35 | -1.76 | 0.39 | 0.588 |
| 12916 | 4-Hydroxy-5-(3'-hydroxyphenyl)-valeric acid-3'-O-sulphate        | 2  | 0.9  | 313.035204 | 1.28      | 0.09 | 1.44 | 0.09 | 0.03 | 1.39           | 0.47 | 3.53  | 0.50 | 4.12  | 0.41           | 0.000 | 1.98  | 0.34 | 2.69  | 0.34 | 3.13  | 0.62 | 0.090 |
| 12953 | No identification                                                | 4  | 1.25 | 313.17525  | 0.59      | 0.04 | 0.79 | 0.07 | 0.03 | 1.14           | 0.23 | 2.23  | 0.27 | 2.78  | 0.38           | 0.000 | 0.42  | 0.19 | 2.02  | 0.24 | 2.55  | 0.30 | 0.000 |
| 13313 | Glutamyl-methionine                                              | 2  | 1.06 | 319.119607 | 0.31      | 0.04 | 0.41 | 0.05 | 0.04 | -0.09          | 0.13 | 0.69  | 0.13 | 0.96  | 0.13           | 0.000 | -0.03 | 0.17 | 0.18  | 0.20 | 0.11  | 0.23 | 0.824 |
| 13414 | Salicylate-sodium                                                | 2  | 0.88 | 321.033866 | 0.79      | 0.07 | 1.13 | 0.07 | 0.02 | 0.82           | 0.33 | 2.23  | 0.35 | 2.39  | 0.38           | 0.002 | 0.76  | 0.26 | 1.27  | 0.29 | 1.50  | 0.27 | 0.145 |
| 13477 | No identification                                                | 4  | 0.99 | 322.110118 | 1.40      | 0.12 | 1.52 | 0.08 | 0.07 | 0.52           | 0.25 | 1.88  | 0.26 | 2.14  | 0.26           | 0.000 | 0.55  | 0.19 | 0.07  | 0.28 | 1.31  | 0.28 | 0.002 |
| 13598 | Flumequine                                                       | 2  | 12.6 | 325.096516 | 1.47      | 0.15 | 1.32 | 0.16 | 0.65 | -0.82          | 0.81 | -0.89 | 0.58 | -3.41 | 0.73           | 0.004 | -0.03 | 0.53 | -0.09 | 0.76 | -1.63 | 0.51 | 0.021 |
| 13672 | Clemizole                                                        | 2  | 14.9 | 326.141885 | 2.03      | 0.29 | 2.70 | 0.29 | 0.04 | -4.61          | 1.46 | -7.11 | 1.28 | -7.17 | 1.38           | 0.000 | -5.83 | 1.13 | -8.61 | 1.51 | -5.23 | 1.47 | 0.145 |
| 13726 | Lamivudine-monophosphate                                         | 2  | 0.90 | 327.05083  | 1.30      | 0.10 | 1.75 | 0.09 | 0.00 | 1.19           | 0.50 | 3.47  | 0.47 | 4.16  | 0.40           | 0.000 | 1.50  | 0.29 | 1.16  | 0.31 | 2.86  | 0.67 | 0.075 |
| 13928 | No identification                                                | 4  | 1.06 | 329.929954 | 0.23      | 0.08 | 0.40 | 0.11 | 0.08 | 1.15           | 0.44 | 2.57  | 0.42 | 2.46  | 0.62           | 0.005 | 0.82  | 0.39 | 2.76  | 0.41 | 2.80  | 0.46 | 0.000 |
| 13980 | No identification                                                | 4  | 1.26 | 331.131401 | 0.67      | 0.03 | 0.78 | 0.04 | 0.35 | 0.72           | 0.20 | 1.86  | 0.25 | 2.35  | 0.32           | 0.000 | 0.01  | 0.17 | 1.20  | 0.15 | 1.94  | 0.21 | 0.000 |
| 14126 | Allantoin                                                        | 1  | 1.06 | 159.051815 | 0.63      | 0.05 | 0.79 | 0.10 | 0.01 | 1.56           | 3.15 | 3.35  | 0.24 | 3.99  | 0.30           | 0.000 | 1.55  | 0.31 | 2.73  | 0.38 | 3.94  | 0.71 | 0.000 |
| 14182 | No identification                                                | 4  | 1.06 | 335.050406 | 0.82      | 0.06 | 0.80 | 0.06 | 0.50 | 0.99           | 0.26 | 2.41  | 0.34 | 1.88  | 0.23           | 0.000 | 0.40  | 0.29 | 1.08  | 0.31 | 1.65  | 0.31 | 0.013 |
| 14452 | No identification                                                | 4  | 10.7 | 339.266784 | 0.47      | 0.08 | 0.58 | 0.36 | 0.98 | 1.80           | 0.26 | 2.49  | 0.40 | 3.52  | 0.36           | 0.000 | 1.33  | 0.71 | 2.35  | 0.73 | 3.32  | 1.07 | 0.041 |
| 14622 | Trans-2-Dodecenoylcarnitine                                      | 2  | 9.76 | 342.263102 | 1.02      | 0.18 | 1.23 | 0.20 | 0.02 | -1.30          | 0.74 | -0.70 | 0.72 | -2.86 | 1.06           | 0.005 | -1.44 | 1.09 | -2.20 | 0.76 | -1.97 | 1.10 | 0.474 |
| 14692 | N-[3-(3-Methoxyphenyl)-4-oxochromen-2-yl]furan-2-carboxamide     | 2  | 0.99 | 344.091955 | 1.10      | 0.10 | 1.25 | 0.06 | 0.02 | 0.34           | 0.28 | 1.82  | 0.28 | 1.76  | 0.25           | 0.000 | 0.82  | 0.23 | 0.34  | 0.24 | 1.35  | 0.25 | 0.043 |
| 14785 | MG(i-17:0/0:0/0:0) 1-15-Methylhexadecanoyl-sn-glycerol           | 2  | 8.79 | 345.299045 | 0.71      | 0.12 | 0.56 | 0.12 | 0.09 | 0.49           | 0.43 | -0.49 | 0.33 | -0.83 | 0.31           | 0.003 | 0.40  | 0.24 | -0.07 | 0.44 | -0.14 | 0.36 | 0.737 |
| 15392 | Triazophos                                                       | 2  | 9.31 | 358.033688 | 1.25      | 0.25 | 0.64 | 0.24 | 0.48 | 0.41           | 0.32 | 0.04  | 0.31 | -0.79 | 0.38           | 0.000 | -0.08 | 0.35 | -0.24 | 0.27 | 0.07  | 0.33 | 0.616 |
| 16481 | No identification                                                | 4  | 3.43 | 379.71064  | 0.06      | 0.03 | 0.06 | 0.05 | 0.13 | -0.22          | 0.16 | 0.15  | 0.10 | 0.00  | 0.17           | 0.001 | 0.16  | 0.13 | 0.04  | 0.18 | -0.02 | 0.24 | 0.269 |
| 17121 | Gomphidic acid                                                   | 2  | 0.90 | 395.038046 | 1.60      | 0.15 | 2.04 | 0.14 | 0.01 | 0.93           | 0.73 | 3.89  | 0.68 | 4.38  | 0.48           | 0.000 | 1.08  | 0.51 | 1.59  | 0.43 | 3.17  | 0.75 | 0.045 |
| 17420 | 2-Fluoro-5-nitrobenzaldehyde                                     | 2  | 0.99 | 402.05038  | 0.95      | 0.07 | 1.01 | 0.06 | 0.17 | 0.16           | 0.19 | 1.73  | 0.28 | 1.21  | 0.20           | 0.001 | 0.01  | 0.29 | 0.07  | 0.20 | 0.96  | 0.17 | 0.124 |
| 17735 | 3-O-Methylniveusin A                                             | 2  | 4.19 | 409.186197 | 0.98      | 0.08 | 1.17 | 0.07 | 0.03 | 0.04           | 0.35 | 1.39  | 0.39 | 1.11  | 0.26           | 0.001 | 0.20  | 0.33 | 0.67  | 0.24 | 1.03  | 0.36 | 0.119 |
| 17975 | N-Docosahexaenoyl GABA                                           | 2  | 11.0 | 414.299272 | 0.22      | 0.04 | 0.19 | 0.04 | 0.21 | 2.30           | 0.68 | 3.75  | 0.91 | 4.77  | 1.08           | 0.000 | 1.20  | 0.46 | 2.99  | 0.40 | 3.67  | 0.73 | 0.000 |
| 17976 | No identification                                                | 4  | 9.38 | 414.299307 | 0.39      | 0.04 | 0.32 | 0.10 | 0.41 | 1.32           | 0.35 | 2.05  | 0.75 | 2.28  | 0.76           | 0.000 | 1.36  | 0.84 | 2.06  | 1.61 | 2.74  | 2.63 | 0.034 |
| 17978 | No identification                                                | 4  | 10.7 | 414.299357 | 0.18      | 0.03 | 0.20 | 0.06 | 0.56 | 3.27           | 0.42 | 4.01  | 0.64 | 4.80  | 0.60           | 0.000 | 2.06  | 0.45 | 3.83  | 0.76 | 5.28  | 1.18 | 0.000 |
| 18079 | 3b-Hydroxy-5-cholenoic acid                                      | 2  | 10.8 | 416.31502  | 0.53      | 0.05 | 0.39 | 0.08 | 0.38 | 2.20           | 0.85 | 2.41  | 0.53 | 3.03  | 0.70           | 0.004 | 2.00  | 0.39 | 2.75  | 0.39 | 2.02  | 0.44 | 0.170 |
| 18080 | No identification                                                | 4  | 10.1 | 416.315105 | 0.45      | 0.05 | 0.51 | 0.12 | 0.61 | 0.80           | 0.54 | 1.74  | 0.40 | 1.82  | 0.55           | 0.004 | 1.40  | 0.16 | 1.87  | 0.38 | 1.53  | 0.46 | 0.345 |
| 18432 | No identification                                                | 4  | 0.97 | 424.870921 | 1.74      | 0.11 | 1.81 | 0.11 | 0.03 | -1.42          | 0.46 | 0.71  | 0.47 | 1.32  | 0.36           | 0.002 | 0.42  | 0.47 | -0.87 | 0.43 | -0.62 | 0.52 | 0.070 |
| 18524 | 6-(2-Carboxyethyl)-7-hydroxy-2,2-dimethyl-4-chromanone glucoside | 2  | 9.38 | 427.158905 | 0.87      | 0.08 | 0.72 | 0.06 | 0.41 | -0.08          | 0.12 | -0.07 | 0.16 | -0.46 | 0.14           | 0.001 | -0.19 | 0.09 | -0.23 | 0.17 | -0.15 | 0.09 | 0.498 |
| 18731 | No identification                                                | 4  | 1.26 | 431.223846 | 0.45      | 0.05 | 0.55 | 0.07 | 0.86 | 1.41           | 0.28 | 2.21  | 0.28 | 2.95  | 0.45           | 0.000 | 1.03  | 0.21 | 2.04  | 0.34 | 3.03  | 0.29 | 0.000 |
| 18771 | Chenodeoxycholic acid glycine conjugate                          | 2  | 9.93 | 432.309526 | 0.44      | 0.05 | 0.32 | 0.07 | 0.33 | 2.00           | 0.49 | 2.42  | 0.59 | 2.76  | 0.69           | 0.000 | 1.94  | 0.43 | 2.34  | 0.32 | 2.58  | 0.56 | 0.053 |
| 18773 | No identification                                                | 4  | 9.38 | 432.309833 | 0.41      | 0.05 | 0.32 | 0.09 | 0.21 | 1.27           | 0.34 | 1.97  | 0.72 | 2.37  | 0.73           | 0.001 | 1.06  | 0.88 | 1.89  | 1.66 | 2.75  | 2.72 | 0.005 |

| No    | Identification                           | LI | Rt   | Mass m/z   | Median t0 |      |      |      |      | Median iAUC NW |      |       |      |       | Median iAUC OB |       |       |      |       |      |       |      |       |
|-------|------------------------------------------|----|------|------------|-----------|------|------|------|------|----------------|------|-------|------|-------|----------------|-------|-------|------|-------|------|-------|------|-------|
|       |                                          |    | min  | Da         | NW        | sem  | OB   | sem  | p    | A              | sem  | B     | sem  | C     | sem            | FDR   | A     | sem  | B     | sem  | C     | sem  | FDR   |
| 18863 | Lithocholic acid glycine conjugate       | 2  | 12.7 | 434.32534  | 0.25      | 0.03 | 0.26 | 0.04 | 0.90 | 2.47           | 0.70 | 3.52  | 0.82 | 4.46  | 1.09           | 0.000 | 1.96  | 0.33 | 3.18  | 0.75 | 3.92  | 0.71 | 0.000 |
| 19200 | Vismodegib                               | 2  | 1.00 | 442.99655  | 0.42      | 0.07 | 0.60 | 0.13 | 0.46 | 0.94           | 0.47 | 1.73  | 0.54 | 2.28  | 0.37           | 0.003 | -0.05 | 0.40 | 2.27  | 0.76 | 1.38  | 0.42 | 0.006 |
| 19403 | No identification                        | 4  | 10.1 | 448.304735 | 0.19      | 0.05 | 0.19 | 0.05 | 0.92 | 1.67           | 0.77 | 3.04  | 0.95 | 3.44  | 0.99           | 0.000 | 1.59  | 0.38 | 2.85  | 0.34 | 3.18  | 0.63 | 0.040 |
| 19448 | No identification                        | 4  | 1.04 | 450.037679 | 0.55      | 0.08 | 0.88 | 0.13 | 0.01 | 1.41           | 0.37 | 2.68  | 0.49 | 4.62  | 0.41           | 0.000 | 1.13  | 0.42 | 3.25  | 0.35 | 4.69  | 0.46 | 0.000 |
| 19482 | Glycodeoxycholic acid                    | 2  | 11.0 | 450.320662 | 0.19      | 0.04 | 0.17 | 0.04 | 0.32 | 2.04           | 0.72 | 3.61  | 0.99 | 4.93  | 1.17           | 0.000 | 1.12  | 0.46 | 2.97  | 0.41 | 3.70  | 0.77 | 0.000 |
| 19483 | No identification                        | 4  | 10.7 | 450.32078  | 0.17      | 0.03 | 0.21 | 0.05 | 0.45 | 3.07           | 0.41 | 3.97  | 0.66 | 4.58  | 0.63           | 0.000 | 2.02  | 0.45 | 3.66  | 0.80 | 5.15  | 1.24 | 0.000 |
| 19802 | 3,5-Dinitrosalicylate                    | 2  | 0.88 | 457.008284 | 0.85      | 0.08 | 1.13 | 0.06 | 0.01 | 0.95           | 0.38 | 2.50  | 0.31 | 2.39  | 0.37           | 0.000 | 0.77  | 0.34 | 1.58  | 0.27 | 2.26  | 0.33 | 0.065 |
| 20003 | Shoyuflavone C                           | 2  | 0.90 | 463.025225 | 1.81      | 0.16 | 2.29 | 0.13 | 0.00 | 0.74           | 0.93 | 4.45  | 0.75 | 4.02  | 0.62           | 0.000 | 1.86  | 0.51 | 1.12  | 0.41 | 3.83  | 1.00 | 0.075 |
| 20006 | 3-Hydroxy-3-carboxymethyl-adipic acid    | 2  | 4.18 | 463.104548 | 1.24      | 0.11 | 1.35 | 0.13 | 0.08 | -0.90          | 0.43 | 1.12  | 0.55 | 2.38  | 0.41           | 0.000 | 0.50  | 0.65 | 1.38  | 0.41 | 1.48  | 0.75 | 0.422 |
| 20194 | Glycocholic acid                         | 2  | 9.31 | 466.315452 | 0.22      | 0.04 | 0.23 | 0.07 | 0.83 | 2.18           | 0.41 | 3.18  | 0.58 | 4.09  | 0.74           | 0.000 | 1.78  | 0.47 | 2.64  | 0.84 | 2.93  | 1.09 | 0.001 |
| 21404 | CD 1790 (HMDB0060809)                    | 2  | 7.85 | 496.206725 | 0.52      | 0.05 | 0.41 | 0.07 | 0.14 | -0.14          | 0.15 | -0.81 | 0.14 | -0.82 | 0.15           | 0.000 | -0.43 | 0.18 | 0.00  | 0.14 | -0.38 | 0.17 | 0.388 |
| 22247 | Adenylylselenate                         | 2  | 0.90 | 516.996921 | 1.88      | 0.23 | 2.09 | 0.15 | 0.07 | 1.52           | 1.11 | 4.68  | 1.03 | 6.28  | 0.94           | 0.002 | 2.62  | 0.95 | 1.96  | 0.57 | 4.04  | 1.00 | 0.314 |
| 22520 | Azido-2',3'-dideoxyuridine               | 2  | 4.42 | 524.197507 | 1.06      | 0.17 | 1.78 | 0.33 | 0.00 | -0.13          | 0.78 | 1.68  | 0.62 | 1.86  | 0.69           | 0.001 | 1.19  | 0.62 | 1.43  | 1.29 | 2.84  | 1.08 | 0.208 |
| 22560 | No identification                        | 4  | 0.88 | 524.99548  | 0.89      | 0.08 | 1.24 | 0.08 | 0.03 | 0.84           | 0.30 | 2.24  | 0.41 | 2.85  | 0.37           | 0.000 | 0.95  | 0.25 | 1.99  | 0.30 | 2.03  | 0.45 | 0.109 |
| 24023 | No identification                        | 4  | 0.88 | 570.98833  | 0.92      | 0.12 | 1.22 | 0.12 | 0.01 | 0.87           | 0.57 | 2.81  | 0.52 | 3.57  | 0.59           | 0.001 | 1.27  | 0.58 | 1.51  | 0.61 | 2.50  | 0.56 | 0.752 |
| 24419 | No identification                        | 4  | 0.88 | 586.96598  | 0.86      | 0.07 | 0.98 | 0.07 | 0.24 | 0.74           | 0.30 | 1.25  | 0.35 | 2.36  | 0.28           | 0.004 | 1.06  | 0.35 | 1.53  | 0.35 | 1.29  | 0.38 | 0.678 |
| 24731 | No identification                        | 4  | 10.7 | 599.248149 | 0.58      | 0.16 | 0.56 | 0.08 | 0.35 | 0.02           | 0.64 | -0.80 | 0.52 | -0.72 | 0.62           | 0.005 | -1.10 | 0.24 | -0.58 | 0.39 | -0.69 | 0.35 | 0.592 |
| 24735 | Lansimide 2                              | 2  | 11.5 | 599.248824 | 0.84      | 0.18 | 0.92 | 0.13 | 0.47 | -0.64          | 0.53 | -1.89 | 0.63 | -1.71 | 0.66           | 0.003 | -1.21 | 0.29 | -0.69 | 0.51 | -0.63 | 0.39 | 0.559 |
| 24806 | APC (HMDB0060661)                        | 2  | 9.97 | 601.264041 | 1.18      | 0.31 | 0.89 | 0.14 | 0.12 | -0.58          | 0.95 | -1.77 | 1.23 | -1.43 | 1.10           | 0.004 | -1.39 | 0.38 | -1.25 | 0.54 | -1.85 | 0.65 | 0.731 |
| 25051 | Debromoaplysiatoxin                      | 2  | 10.2 | 610.357201 | 0.17      | 0.06 | 0.26 | 0.16 | 0.93 | 1.24           | 0.74 | 2.09  | 0.57 | 1.93  | 0.76           | 0.000 | 2.02  | 0.24 | 2.44  | 0.55 | 2.38  | 0.68 | 0.084 |
| 25193 | No identification                        | 4  | 10.4 | 616.255245 | 0.68      | 0.12 | 0.70 | 0.10 | 0.39 | -0.22          | 0.44 | -0.65 | 0.63 | -1.01 | 0.42           | 0.002 | -0.53 | 0.25 | -0.69 | 0.28 | -1.03 | 0.26 | 0.767 |
| 25265 | Teraspidole B_130089                     | 2  | 8.23 | 619.274746 | 0.51      | 0.23 | 0.44 | 0.09 | 0.26 | -0.04          | 1.13 | -0.49 | 0.44 | -1.05 | 0.57           | 0.003 | -1.03 | 0.34 | -0.49 | 0.29 | -0.44 | 0.32 | 0.528 |
| 25422 | Glycochenodeoxycholic acid 3-glucuronide | 2  | 9.24 | 626.3521   | 0.32      | 0.08 | 0.34 | 0.21 | 0.78 | 1.03           | 0.27 | 1.40  | 0.33 | 1.27  | 0.43           | 0.000 | 0.63  | 0.21 | 1.37  | 0.21 | 1.65  | 0.28 | 0.000 |
| 25900 | Norcisapride                             | 2  | 1.25 | 649.230986 | 0.64      | 0.07 | 0.97 | 0.20 | 0.33 | 1.06           | 0.21 | 1.51  | 0.36 | 2.45  | 0.36           | 0.001 | 0.51  | 0.39 | 1.15  | 0.66 | 1.40  | 0.66 | 0.083 |
| 28733 | Tribenuron-methyl                        | 2  | 1.26 | 854.193255 | 1.77      | 0.14 | 3.02 | 0.23 | 0.00 | -0.78          | 0.36 | 1.19  | 0.36 | 0.45  | 0.36           | 0.005 | -0.37 | 0.43 | -0.49 | 0.54 | 0.53  | 0.50 | 0.017 |

<sup>1</sup> Median values of the fasting and postprandial features. HF meals: A = 500, B = 1000, C = 1500 kcal; sem, standard error of mean; *p*, *p*-value of Kruskal–Wallis rank sum test without adjustment for multiple testing comparing the fasting values of the features in the NW and OB groups. Features with a significant fasting differences between the NW and OB group are indicated in yellow; *FDR*, FDR corrected *p*-value of Kruskal–Wallis rank sum test comparing the postprandial iAUC of the NW and OB group after the ingestion of each dose of the HF meal (Benjamini and Hochberg 1995). Abbreviations: iAUC: incremental area under the curve; LI: level of identification; NW: normal weight; OB: obese; Rt: retention time.

**SUPPLEMENTAL TABLE S2** Correlation of 52 LC-MS features at fasting (t0) with iAUC results for HF meals A, B, and C for NW and OB groups and for HF meal A for the NW group only<sup>1</sup>

| No    | Feature with level 1 or 3 identification | Meal A<br>NW+OB |            | Meal B<br>NW+OB |            | Meal C<br>NW+OB |            | Meal A<br>NW only |            |
|-------|------------------------------------------|-----------------|------------|-----------------|------------|-----------------|------------|-------------------|------------|
|       |                                          | <i>r</i>        | <i>FDR</i> | <i>r</i>        | <i>FDR</i> | <i>r</i>        | <i>FDR</i> | <i>r</i>          | <i>FDR</i> |
| 1006  |                                          | -0.30           | 0.12       | -0.57           | 0.00       | -0.30           | 0.17       | -0.43             | 0.21       |
| 10249 |                                          | -0.21           | 0.28       | -0.28           | 0.12       | 0.18            | 0.41       | -0.49             | 0.16       |
| 10564 |                                          | -0.76           | 0.00       | -0.77           | 0.00       | -0.76           | 0.00       | -0.76             | 0.01       |
| 12456 |                                          | -0.46           | 0.02       | -0.68           | 0.00       | -0.71           | 0.00       | -0.64             | 0.05       |
| 12793 |                                          | -0.45           | 0.02       | -0.38           | 0.04       | -0.26           | 0.24       | 0.19              | 0.58       |
| 12804 |                                          | -0.54           | 0.00       | -0.35           | 0.05       | -0.12           | 0.59       | -0.60             | 0.08       |
| 12916 |                                          | -0.22           | 0.25       | -0.31           | 0.09       | -0.10           | 0.64       | -0.16             | 0.65       |
| 12953 |                                          | -0.45           | 0.02       | -0.31           | 0.10       | -0.05           | 0.80       | -0.66             | 0.05       |
| 13313 |                                          | -0.70           | 0.00       | -0.71           | 0.00       | -0.60           | 0.00       | -0.76             | 0.01       |
| 13414 |                                          | -0.62           | 0.00       | -0.42           | 0.02       | -0.45           | 0.03       | -0.60             | 0.08       |
| 13672 |                                          | -0.86           | 0.00       | -0.88           | 0.00       | -0.94           | 0.00       | -0.87             | 0.00       |
| 13726 |                                          | -0.36           | 0.06       | -0.60           | 0.00       | -0.29           | 0.19       | -0.36             | 0.30       |
| 14126 | Allantoin                                | -0.15           | 0.42       | -0.30           | 0.11       | 0.03            | 0.86       | -0.11             | 0.72       |
| 1419  |                                          | -0.27           | 0.16       | -0.29           | 0.11       | -0.10           | 0.64       | -0.23             | 0.49       |
| 14622 |                                          | -0.79           | 0.00       | -0.87           | 0.00       | -0.93           | 0.00       | -0.71             | 0.03       |
| 14692 |                                          | -0.36           | 0.06       | -0.44           | 0.02       | -0.41           | 0.05       | -0.14             | 0.68       |
| 1544  | Creatine                                 | 0.17            | 0.39       | 0.43            | 0.02       | 0.58            | 0.00       | 0.34              | 0.31       |
| 1659  | Alanine                                  | -0.48           | 0.01       | -0.39           | 0.03       | -0.53           | 0.01       | -0.48             | 0.18       |
| 17121 |                                          | -0.32           | 0.09       | -0.45           | 0.02       | -0.23           | 0.27       | -0.36             | 0.30       |
| 17735 |                                          | -0.39           | 0.04       | -0.68           | 0.00       | -0.51           | 0.01       | -0.43             | 0.21       |
| 1797  |                                          | -0.51           | 0.01       | -0.53           | 0.00       | -0.37           | 0.08       | -0.46             | 0.19       |
| 18432 |                                          | -0.57           | 0.00       | -0.62           | 0.00       | -0.67           | 0.00       | -0.51             | 0.15       |
| 19448 |                                          | -0.20           | 0.30       | -0.04           | 0.84       | 0.11            | 0.62       | -0.01             | 0.98       |
| 19802 |                                          | -0.43           | 0.02       | -0.38           | 0.04       | -0.43           | 0.04       | -0.43             | 0.21       |
| 20003 |                                          | -0.34           | 0.08       | -0.60           | 0.00       | -0.29           | 0.19       | -0.29             | 0.40       |
| 22520 |                                          | -0.23           | 0.25       | -0.25           | 0.17       | 0.06            | 0.76       | -0.13             | 0.68       |
| 22560 |                                          | -0.39           | 0.04       | -0.37           | 0.05       | -0.54           | 0.01       | -0.24             | 0.48       |
| 24023 |                                          | -0.70           | 0.00       | -0.73           | 0.00       | -0.50           | 0.01       | -0.63             | 0.05       |
| 2518  |                                          | -0.45           | 0.02       | -0.56           | 0.00       | -0.30           | 0.17       | -0.42             | 0.22       |
| 2548  | Lysine                                   | -0.33           | 0.09       | -0.30           | 0.10       | -0.07           | 0.75       | -0.36             | 0.30       |
| 28733 |                                          | -0.02           | 0.93       | -0.55           | 0.00       | 0.15            | 0.51       | -0.30             | 0.38       |
| 2960  |                                          | -0.70           | 0.00       | -0.70           | 0.00       | -0.54           | 0.01       | -0.74             | 0.02       |
| 3632  |                                          | -0.36           | 0.06       | -0.55           | 0.00       | -0.23           | 0.27       | -0.66             | 0.05       |
| 3681  |                                          | -0.49           | 0.01       | -0.34           | 0.06       | -0.23           | 0.27       | -0.24             | 0.48       |
| 3852  |                                          | -0.64           | 0.00       | -0.47           | 0.01       | -0.31           | 0.16       | -0.55             | 0.12       |
| 3902  |                                          | -0.40           | 0.04       | -0.44           | 0.02       | -0.25           | 0.24       | -0.65             | 0.05       |
| 4315  | Arginine                                 | -0.26           | 0.18       | -0.40           | 0.03       | -0.25           | 0.25       | -0.35             | 0.31       |



| No   | Feature with level 1 or 3 identification | Meal A<br>NW+OB |      | Meal B<br>NW+OB |      | Meal C<br>NW+OB |      | Meal A<br>NW only |      |
|------|------------------------------------------|-----------------|------|-----------------|------|-----------------|------|-------------------|------|
| 4740 |                                          | -0.36           | 0.06 | -0.51           | 0.01 | -0.18           | 0.41 | -0.45             | 0.21 |
| 4896 |                                          | -0.71           | 0.00 | -0.52           | 0.00 | -0.40           | 0.06 | -0.85             | 0.00 |
| 5270 | Homoarginine                             | -0.27           | 0.17 | -0.01           | 0.95 | -0.32           | 0.15 | -0.09             | 0.76 |
| 6369 |                                          | -0.59           | 0.00 | -0.59           | 0.00 | -0.71           | 0.00 | -0.58             | 0.09 |
| 66   |                                          | -0.61           | 0.00 | -0.43           | 0.02 | -0.28           | 0.20 | -0.52             | 0.14 |
| 6672 |                                          | -0.12           | 0.51 | 0.14            | 0.45 | 0.59            | 0.00 | 0.51              | 0.14 |
| 7137 |                                          | -0.14           | 0.45 | -0.54           | 0.00 | -0.37           | 0.08 | -0.25             | 0.48 |
| 781  | Valine                                   | -0.49           | 0.01 | -0.55           | 0.00 | -0.26           | 0.24 | -0.22             | 0.51 |
| 7876 |                                          | -0.39           | 0.04 | -0.37           | 0.04 | -0.30           | 0.18 | -0.51             | 0.14 |
| 858  | Homoserine or threonine                  | -0.56           | 0.00 | -0.49           | 0.01 | -0.52           | 0.01 | -0.26             | 0.46 |
| 867  |                                          | -0.55           | 0.00 | -0.37           | 0.05 | -0.23           | 0.27 | -0.31             | 0.38 |
| 8826 |                                          | -0.52           | 0.01 | -0.49           | 0.01 | -0.13           | 0.57 | -0.42             | 0.22 |
| 9144 |                                          | 0.00            | 0.99 | -0.40           | 0.03 | -0.25           | 0.24 | -0.43             | 0.21 |
| 9539 |                                          | -0.42           | 0.03 | -0.63           | 0.00 | -0.44           | 0.03 | -0.39             | 0.26 |
| 9703 |                                          | -0.29           | 0.14 | -0.43           | 0.02 | -0.04           | 0.83 | -0.14             | 0.68 |

<sup>1</sup>HF meals: A = 500, B = 1000, C = 1500 kcal; NW, normal weight group; OB, obese group; *r*, Spearman correlation coefficient; Features with a significant correlations are indicated in yellow; *FDR*, FDR corrected *p*-value of Kruskal–Wallis rank sum test (Benjamini and Hochberg 1995).

**SUPPLEMENTAL TABLE S3** Median results of ten amino acids quantified with GC-MS at fasting (t0) and iAUC for NW and OB subjects for meal A, B, and C and FDR corrected *p*-values<sup>1</sup>

| Identification | Rt    | Quantifier | Qualifier | Median fasting data (t0) |          |          |          |          | Median iAUC NW |          |          |          |          |          | Median iAUC OB |           |          |           |          |          |          |            |
|----------------|-------|------------|-----------|--------------------------|----------|----------|----------|----------|----------------|----------|----------|----------|----------|----------|----------------|-----------|----------|-----------|----------|----------|----------|------------|
|                | min   | m/z        | m/z       | NW                       | sem      | OB       | sem      | <i>p</i> | A              | sem      | B        | sem      | C        | sem      | <i>FDR</i>     | A         | sem      | B         | sem      | C        | sem      | <i>FDR</i> |
| Beta-alanine   | 23.40 | 174        | 248       | 1.28E+05                 | 1.52E+04 | 1.31E+05 | 2.17E+04 | 0.857    | 8.28E+05       | 1.30E+05 | 1.46E+06 | 2.15E+05 | 2.32E+06 | 1.30E+05 | 0.005          | 4.82E+05  | 6.15E+04 | 1.03E+06  | 1.37E+05 | 1.38E+06 | 2.32E+05 | 0.001      |
| Cystine        | 34.05 | 218        | 146       | 4.93E+05                 | 7.34E+04 | 5.12E+05 | 3.81E+04 | 0.563    | 2.38E+04       | 2.48E+05 | 2.22E+05 | 1.03E+05 | 4.23E+05 | 3.11E+05 | 0.613          | 3.20E+05  | 2.83E+05 | -2.96E+04 | 1.87E+05 | 1.28E+05 | 1.89E+05 | 0.805      |
| Isoleucine     | 20.19 | 158        | 218       | 3.63E+06                 | 3.03E+05 | 5.00E+06 | 4.13E+05 | 0.001    | 5.52E+06       | 1.62E+06 | 1.27E+07 | 1.99E+06 | 2.31E+07 | 3.66E+06 | 0.006          | 3.54E+06  | 7.77E+05 | 1.42E+07  | 2.82E+06 | 1.54E+07 | 1.97E+06 | 0.018      |
| Proline        | 20.40 | 142        | 216       | 8.37E+06                 | 1.37E+06 | 1.04E+07 | 1.35E+06 | 0.065    | 2.36E+06       | 4.50E+06 | 8.05E+06 | 3.97E+06 | 3.00E+07 | 1.05E+07 | 0.160          | -8.49E+05 | 3.53E+06 | 1.14E+07  | 6.95E+06 | 1.03E+07 | 5.32E+06 | 0.312      |
| Threonine      | 22.4  | 218        | 291       | 3.24E+06                 | 3.31E+05 | 2.92E+06 | 1.57E+05 | 0.539    | 1.86E+06       | 9.39E+05 | 4.03E+06 | 6.85E+05 | 9.08E+06 | 1.60E+06 | 0.014          | 6.38E+05  | 3.49E+05 | 2.41E+06  | 8.00E+05 | 3.01E+06 | 6.39E+05 | 0.097      |
| Phenylalanine  | 26.92 | 218        | 192       | 3.67E+06                 | 2.43E+05 | 3.82E+06 | 1.18E+05 | 0.294    | 1.12E+06       | 9.99E+05 | 2.68E+06 | 6.53E+05 | 7.92E+06 | 1.15E+06 | 0.027          | -2.78E+05 | 6.59E+05 | 1.81E+06  | 4.18E+05 | 3.47E+06 | 5.02E+05 | 0.015      |
| Ornithine      | 29.32 | 142        | 420       | 3.25E+06                 | 1.58E+05 | 3.57E+06 | 1.81E+05 | 0.060    | 3.53E+06       | 6.96E+05 | 7.73E+06 | 3.32E+05 | 1.05E+07 | 2.85E+05 | 0.002          | 3.72E+06  | 5.79E+05 | 5.44E+06  | 6.13E+05 | 5.65E+06 | 9.04E+05 | 0.018      |
| Histidine      | 30.53 | 154        | 254       | 3.46E+06                 | 2.55E+05 | 3.68E+06 | 2.82E+05 | 0.329    | 3.49E+06       | 1.01E+06 | 5.37E+06 | 1.00E+06 | 9.86E+06 | 7.91E+05 | 0.016          | 1.10E+06  | 7.99E+05 | 3.05E+06  | 8.72E+05 | 4.24E+06 | 7.03E+05 | 0.058      |
| Tyrosine       | 30.71 | 280        | 100       | 1.12E+06                 | 4.64E+04 | 1.35E+06 | 6.08E+04 | <0.001   | 2.26E+05       | 1.51E+05 | 1.55E+06 | 1.45E+05 | 2.28E+06 | 1.67E+05 | 0.002          | -1.55E+05 | 3.20E+05 | 7.55E+05  | 1.80E+05 | 1.19E+06 | 1.83E+05 | 0.075      |
| Glutamic acid  | 26.68 | 246        | 128       | 3.52E+05                 | 4.03E+04 | 5.73E+05 | 7.06E+04 | <0.001   | -1.36E+05      | 1.91E+05 | 1.99E+05 | 2.17E+05 | 8.80E+05 | 1.49E+05 | 0.022          | -2.05E+05 | 1.52E+05 | 1.25E+05  | 2.50E+05 | 2.07E+05 | 2.47E+05 | 0.519      |

<sup>1</sup> Median values: HF meals: A = 500, B = 1000, C = 1500 kcal; Rt, retention time; Quantifier, mass detector quantifier ion; Qualifier, mass detector qualifier ion m/z mass signal; NW, normal weight; OB, obese; sem, standard error of mean; *p*, *p*-value of Kruskal–Wallis rank sum test without adjustment for multiple testing; Features with a significant fasting differences between the NW and OB group are indicated in yellow; Features with a significant fasting differences between the NW and OB group are indicated in yellow; *FDR*, FDR corrected *p*-value of Kruskal–Wallis rank sum test (Benjamini and Hochberg 1995).

**SUPPLEMENTAL TABLE S4** Characterization of the postprandial response (iAUC 0-6 h) of metabolic, hormonal, and inflammatory variables in NW (n = 15) and OB (n = 17) men having consumed 500, 1000, and 1500 kcal of the HF meal

| Parameter                 | Mean iAUC NW                |                             |                             | Mean iAUC OB                |                              |                              |
|---------------------------|-----------------------------|-----------------------------|-----------------------------|-----------------------------|------------------------------|------------------------------|
|                           | A                           | B                           | C                           | A                           | B                            | C                            |
| Glucose, mmol*h/L         | -2.23 ± 0.42                | -1.93 ± 0.72                | -0.90 ± 0.43                | -1.19 ± 0.53                | -0.71 ± 0.64                 | 1.75 ± 0.97*                 |
| Insulin mU*h/L            | 15.24 ± 3.83 <sup>c</sup>   | 40.40 ± 6.49 <sup>b</sup>   | 64.46 ± 10.49 <sup>a</sup>  | 68.29 ± 11.14 <sup>*c</sup> | 180.06 ± 23.79 <sup>*b</sup> | 321.16 ± 45.03 <sup>*a</sup> |
| Triglyceride mmol*h/L     | 2.11 ± 0.36 <sup>b</sup>    | 4.65 ± 0.54 <sup>a</sup>    | 5.26 ± 0.55 <sup>a</sup>    | 2.44 ± 0.36 <sup>c</sup>    | 4.87 ± 0.50 <sup>b</sup>     | 5.98 ± 0.46 <sup>a</sup>     |
| Cholesterol, mmol*h/L     | -1.05 ± 0.41                | -1.25 ± 0.28                | -1.28 ± 0.26                | -0.43 ± 0.22                | -0.14 ± 0.21*                | -0.78 ± 0.20                 |
| HDL cholesterol, mmol*h/L | -0.325 ± 0.092 <sup>a</sup> | -0.776 ± 0.084 <sup>b</sup> | -0.698 ± 0.091 <sup>b</sup> | -0.243 ± 0.089 <sup>a</sup> | -0.615 ± 0.147 <sup>b</sup>  | -0.548 ± 0.084 <sup>b</sup>  |
| Total:HDL cholesterol h   | 0.380 ± 0.208 <sup>b</sup>  | 1.383 ± 0.406 <sup>a</sup>  | 1.200 ± 0.374 <sup>a</sup>  | 0.371 ± 0.299 <sup>b</sup>  | 2.277 ± 0.579 <sup>a</sup>   | 1.773 ± 0.329 <sup>a</sup>   |
| CRP, mg*h/L               | 0.081 ± 0.236               | -0.266 ± 0.122              | -0.436 ± 0.084              | -0.309 ± 0.162              | -0.338 ± 0.246               | -0.713 ± 0.517               |
| IL-6, pg*h/mL             | -11.99 ± 5.56 <sup>b</sup>  | 9.81 ± 7.91 <sup>a</sup>    | 9.47 ± 6.43 <sup>a</sup>    | -2.14 ± 5.53                | 9.90 ± 10.51                 | 22.88 ± 6.76                 |
| Endotoxin, EU*h/mL        | 0.64 ± 0.45 <sup>a</sup>    | 2.23 ± 0.62 <sup>b</sup>    | 2.90 ± 0.64 <sup>b</sup>    | 0.35 ± 0.78                 | 1.15 ± 0.96                  | 2.71 ± 0.44                  |
| GLP-1, pmol*h/L           | 45.29 ± 14.40               | 54.59 ± 18.87               | 75.13 ± 30.63               | 46.12 ± 7.98                | 68.53 ± 8.85                 | 76.13 ± 12.85                |

Values are means ± SEMs. HF meals: A = 500, B = 1000, C = 1500 kcal; Means in a row without a common letter differ within a group (Kruskal Wallis rank-sum-test  $p < 0.05$  and pairwise comparison Conover-Iman test  $p < 0.05$ ). \*Indicates a different mean from the corresponding normal-weight group (Wilcoxon Rank Sum Test,  $p < 0.05$ ). Glucose, CRP, TGs, cholesterol, and HDL cholesterol were analyzed in plasma. Insulin, IL-6, endotoxin, and GLP-1 were analyzed in serum. CRP, C-reactive protein; EU, endotoxin units; GLP-1, glucagon-like peptide-1; HF, high-fat; iAUC, incremental AUC (Adapted from Schwander et al. 2014).



**SUPPLEMENTAL TABLE S5** Correlation coefficients and FDR values of postprandial iAUC clinical data with 52 iAUC LC-MS results for NW subjects<sup>1</sup>

| No    | Feature   | Total/HDL cholesterol |            | HDL cholesterol |            | Total cholesterol |            | Endotoxin |            | GLP-1    |            | Glucose  |            | CRP      |            | IL-6     |            | Insulin  |            | TNF-alpha |            | Triglyceride |            |
|-------|-----------|-----------------------|------------|-----------------|------------|-------------------|------------|-----------|------------|----------|------------|----------|------------|----------|------------|----------|------------|----------|------------|-----------|------------|--------------|------------|
|       |           | <i>r</i>              | <i>FDR</i> | <i>r</i>        | <i>FDR</i> | <i>r</i>          | <i>FDR</i> | <i>r</i>  | <i>FDR</i> | <i>r</i> | <i>FDR</i> | <i>r</i> | <i>FDR</i> | <i>r</i> | <i>FDR</i> | <i>r</i> | <i>FDR</i> | <i>r</i> | <i>FDR</i> | <i>r</i>  | <i>FDR</i> | <i>r</i>     | <i>FDR</i> |
| 1006  |           | 0.18                  | 0.31       | -0.33           | 0.04       | -0.31             | 0.34       | 0.13      | 0.44       | 0.21     | 0.67       | 0.05     | 0.97       | -0.17    | 0.78       | 0.04     | 0.88       | 0.52     | 0.00       | 0.04      | 0.90       | 0.38         | 0.02       |
| 10249 |           | 0.25                  | 0.19       | -0.37           | 0.03       | -0.25             | 0.34       | 0.44      | 0.04       | 0.01     | 0.98       | 0.29     | 0.41       | -0.43    | 0.16       | 0.25     | 0.68       | 0.57     | 0.00       | 0.21      | 0.84       | 0.50         | 0.00       |
| 10564 |           | 0.02                  | 0.91       | 0.18            | 0.27       | 0.17              | 0.43       | -0.29     | 0.14       | 0.00     | 0.99       | -0.24    | 0.77       | 0.48     | 0.11       | -0.05    | 0.88       | -0.02    | 0.90       | -0.07     | 0.84       | -0.08        | 0.61       |
| 12456 |           | 0.18                  | 0.30       | -0.10           | 0.54       | -0.06             | 0.76       | 0.11      | 0.51       | -0.08    | 0.84       | -0.08    | 0.97       | 0.17     | 0.78       | -0.15    | 0.88       | 0.10     | 0.53       | -0.18     | 0.84       | 0.25         | 0.11       |
| 12793 |           | 0.27                  | 0.18       | -0.38           | 0.03       | -0.08             | 0.64       | 0.26      | 0.18       | 0.17     | 0.67       | 0.06     | 0.97       | -0.01    | 1.00       | 0.24     | 0.68       | 0.48     | 0.00       | 0.24      | 0.84       | 0.47         | 0.00       |
| 12804 |           | 0.23                  | 0.21       | -0.35           | 0.04       | -0.24             | 0.34       | 0.16      | 0.35       | 0.18     | 0.67       | 0.03     | 0.97       | -0.03    | 1.00       | 0.05     | 0.88       | 0.24     | 0.13       | 0.04      | 0.90       | 0.39         | 0.01       |
| 12916 |           | 0.21                  | 0.26       | -0.39           | 0.02       | -0.28             | 0.34       | 0.17      | 0.32       | 0.10     | 0.84       | 0.11     | 0.97       | -0.15    | 0.86       | -0.04    | 0.88       | 0.31     | 0.05       | 0.01      | 0.95       | 0.32         | 0.04       |
| 12953 |           | 0.25                  | 0.19       | -0.38           | 0.03       | -0.22             | 0.36       | 0.40      | 0.09       | 0.03     | 0.89       | 0.13     | 0.97       | -0.21    | 0.78       | 0.08     | 0.88       | 0.43     | 0.01       | 0.12      | 0.84       | 0.44         | 0.01       |
| 13313 |           | 0.13                  | 0.43       | -0.19           | 0.25       | 0.02              | 0.92       | 0.17      | 0.32       | 0.27     | 0.67       | 0.22     | 0.85       | 0.11     | 0.96       | 0.18     | 0.86       | 0.31     | 0.05       | 0.14      | 0.84       | 0.28         | 0.07       |
| 13414 |           | 0.13                  | 0.44       | -0.36           | 0.03       | -0.18             | 0.42       | 0.34      | 0.13       | 0.10     | 0.84       | -0.17    | 0.97       | 0.01     | 1.00       | 0.03     | 0.89       | 0.37     | 0.02       | 0.09      | 0.84       | 0.34         | 0.03       |
| 13672 |           | -0.17                 | 0.34       | 0.40            | 0.02       | 0.09              | 0.63       | -0.28     | 0.15       | -0.19    | 0.67       | -0.49    | 0.03       | 0.27     | 0.56       | -0.24    | 0.68       | -0.26    | 0.09       | -0.26     | 0.84       | -0.24        | 0.11       |
| 13726 |           | 0.21                  | 0.26       | -0.38           | 0.03       | -0.23             | 0.34       | 0.22      | 0.23       | 0.20     | 0.67       | 0.03     | 0.97       | -0.11    | 0.96       | 0.09     | 0.88       | 0.46     | 0.00       | 0.08      | 0.84       | 0.49         | 0.00       |
| 14126 | Allantoin | 0.31                  | 0.14       | -0.45           | 0.01       | -0.33             | 0.34       | 0.55      | 0.00       | -0.06    | 0.85       | 0.39     | 0.10       | -0.39    | 0.16       | 0.30     | 0.68       | 0.48     | 0.00       | 0.29      | 0.84       | 0.46         | 0.00       |
| 1419  |           | 0.29                  | 0.15       | -0.43           | 0.02       | -0.23             | 0.34       | 0.28      | 0.14       | 0.18     | 0.67       | -0.07    | 0.97       | -0.09    | 0.96       | 0.09     | 0.88       | 0.43     | 0.01       | 0.13      | 0.84       | 0.50         | 0.00       |
| 14622 |           | 0.31                  | 0.14       | 0.07            | 0.65       | 0.16              | 0.43       | -0.04     | 0.78       | -0.08    | 0.84       | -0.38    | 0.10       | 0.40     | 0.16       | 0.05     | 0.88       | -0.02    | 0.91       | 0.04      | 0.90       | 0.24         | 0.11       |
| 14692 |           | 0.19                  | 0.28       | -0.37           | 0.03       | -0.23             | 0.34       | 0.24      | 0.20       | 0.07     | 0.85       | 0.11     | 0.97       | -0.10    | 0.96       | 0.21     | 0.68       | 0.43     | 0.01       | 0.21      | 0.84       | 0.39         | 0.01       |
| 1544  | Creatine  | 0.42                  | 0.10       | -0.56           | 0.00       | -0.31             | 0.34       | 0.47      | 0.03       | 0.03     | 0.89       | 0.38     | 0.10       | -0.34    | 0.24       | 0.29     | 0.68       | 0.63     | 0.00       | 0.27      | 0.84       | 0.63         | 0.00       |
| 1659  | Alanine   | -0.09                 | 0.57       | -0.16           | 0.32       | -0.09             | 0.64       | 0.09      | 0.56       | 0.26     | 0.67       | 0.01     | 0.98       | -0.07    | 1.00       | 0.13     | 0.88       | 0.46     | 0.00       | 0.07      | 0.84       | 0.20         | 0.19       |
| 17121 |           | 0.32                  | 0.14       | -0.41           | 0.02       | -0.09             | 0.64       | 0.13      | 0.42       | 0.18     | 0.67       | 0.07     | 0.97       | 0.00     | 1.00       | 0.23     | 0.68       | 0.52     | 0.00       | 0.18      | 0.84       | 0.48         | 0.00       |
| 17735 |           | 0.26                  | 0.19       | -0.28           | 0.08       | -0.01             | 0.98       | 0.15      | 0.36       | 0.06     | 0.85       | -0.07    | 0.97       | 0.06     | 1.00       | 0.00     | 0.98       | 0.42     | 0.01       | -0.01     | 0.95       | 0.34         | 0.03       |
| 1797  |           | 0.16                  | 0.35       | -0.33           | 0.05       | -0.26             | 0.34       | 0.22      | 0.23       | 0.28     | 0.67       | 0.04     | 0.97       | -0.18    | 0.78       | 0.04     | 0.88       | 0.56     | 0.00       | 0.05      | 0.90       | 0.42         | 0.01       |
| 18432 |           | 0.16                  | 0.35       | -0.17           | 0.29       | -0.17             | 0.43       | 0.25      | 0.19       | -0.05    | 0.86       | 0.11     | 0.97       | -0.26    | 0.56       | 0.17     | 0.87       | 0.25     | 0.11       | 0.14      | 0.84       | 0.27         | 0.08       |
| 19448 |           | 0.25                  | 0.19       | -0.32           | 0.05       | -0.16             | 0.43       | 0.33      | 0.13       | 0.24     | 0.67       | 0.39     | 0.10       | -0.30    | 0.41       | 0.29     | 0.68       | 0.50     | 0.00       | 0.28      | 0.84       | 0.54         | 0.00       |
| 19802 |           | 0.19                  | 0.28       | -0.30           | 0.06       | -0.10             | 0.62       | 0.30      | 0.14       | 0.06     | 0.85       | -0.05    | 0.97       | 0.04     | 1.00       | 0.15     | 0.88       | 0.44     | 0.01       | 0.14      | 0.84       | 0.41         | 0.01       |
| 20003 |           | 0.20                  | 0.28       | -0.41           | 0.02       | -0.29             | 0.34       | 0.18      | 0.32       | 0.21     | 0.67       | 0.14     | 0.97       | -0.24    | 0.63       | 0.04     | 0.88       | 0.46     | 0.00       | 0.05      | 0.90       | 0.44         | 0.01       |
| 22520 |           | 0.31                  | 0.14       | -0.24           | 0.14       | -0.08             | 0.64       | 0.15      | 0.36       | 0.03     | 0.89       | -0.10    | 0.97       | -0.05    | 1.00       | -0.24    | 0.68       | 0.34     | 0.03       | -0.24     | 0.84       | 0.32         | 0.04       |
| 22560 |           | 0.23                  | 0.21       | -0.42           | 0.02       | -0.18             | 0.43       | 0.29      | 0.14       | 0.17     | 0.67       | -0.04    | 0.97       | -0.08    | 1.00       | 0.04     | 0.88       | 0.50     | 0.00       | 0.07      | 0.84       | 0.43         | 0.01       |
| 24023 |           | -0.01                 | 0.96       | -0.10           | 0.53       | -0.15             | 0.44       | 0.26      | 0.18       | 0.03     | 0.89       | 0.14     | 0.97       | -0.38    | 0.16       | 0.23     | 0.68       | 0.40     | 0.01       | 0.15      | 0.84       | 0.33         | 0.03       |
| 2518  |           | 0.19                  | 0.29       | -0.31           | 0.05       | -0.26             | 0.34       | 0.28      | 0.14       | 0.24     | 0.67       | 0.04     | 0.97       | -0.15    | 0.86       | 0.09     | 0.88       | 0.59     | 0.00       | 0.07      | 0.84       | 0.45         | 0.00       |
| 2548  | Lysine    | 0.31                  | 0.14       | -0.45           | 0.01       | -0.21             | 0.37       | 0.29      | 0.14       | 0.18     | 0.67       | -0.05    | 0.97       | -0.05    | 1.00       | 0.10     | 0.88       | 0.45     | 0.00       | 0.15      | 0.84       | 0.51         | 0.00       |
| 28733 |           | 0.31                  | 0.14       | -0.40           | 0.02       | -0.30             | 0.34       | 0.17      | 0.32       | 0.09     | 0.84       | 0.10     | 0.97       | -0.01    | 1.00       | 0.15     | 0.88       | 0.34     | 0.03       | 0.13      | 0.84       | 0.39         | 0.01       |
| 2960  |           | 0.37                  | 0.10       | -0.49           | 0.01       | -0.28             | 0.34       | 0.35      | 0.13       | 0.15     | 0.73       | -0.07    | 0.97       | -0.19    | 0.78       | 0.19     | 0.84       | 0.51     | 0.00       | 0.21      | 0.84       | 0.57         | 0.00       |
| 3632  |           | 0.24                  | 0.20       | -0.33           | 0.04       | -0.18             | 0.43       | 0.18      | 0.32       | 0.20     | 0.67       | 0.03     | 0.97       | -0.12    | 0.96       | 0.06     | 0.88       | 0.53     | 0.00       | 0.04      | 0.90       | 0.45         | 0.00       |
| 3681  |           | 0.28                  | 0.17       | -0.32           | 0.05       | -0.12             | 0.54       | 0.21      | 0.23       | 0.13     | 0.81       | 0.01     | 0.98       | -0.03    | 1.00       | 0.09     | 0.88       | 0.29     | 0.06       | 0.08      | 0.84       | 0.38         | 0.02       |
| 3852  |           | 0.29                  | 0.15       | -0.35           | 0.04       | -0.16             | 0.43       | 0.17      | 0.33       | 0.10     | 0.84       | -0.05    | 0.97       | 0.10     | 0.96       | 0.11     | 0.88       | 0.30     | 0.05       | 0.10      | 0.84       | 0.36         | 0.02       |

| No   | Feature                 | Total/HDL cholesterol |            | HDL cholesterol |            | Total cholesterol |            | Endotoxin |            | GLP-1    |            | Glucose  |            | CRP      |            | IL-6     |            | Insulin  |            | TNF-alpha |            | Triglyceride |            |
|------|-------------------------|-----------------------|------------|-----------------|------------|-------------------|------------|-----------|------------|----------|------------|----------|------------|----------|------------|----------|------------|----------|------------|-----------|------------|--------------|------------|
|      |                         | <i>r</i>              | <i>FDR</i> | <i>r</i>        | <i>FDR</i> | <i>r</i>          | <i>FDR</i> | <i>r</i>  | <i>FDR</i> | <i>r</i> | <i>FDR</i> | <i>r</i> | <i>FDR</i> | <i>r</i> | <i>FDR</i> | <i>r</i> | <i>FDR</i> | <i>r</i> | <i>FDR</i> | <i>r</i>  | <i>FDR</i> | <i>r</i>     | <i>FDR</i> |
| 3902 |                         | 0.30                  | 0.14       | -0.46           | 0.01       | -0.24             | 0.34       | 0.31      | 0.13       | 0.08     | 0.84       | -0.11    | 0.97       | -0.06    | 1.00       | 0.07     | 0.88       | 0.43     | 0.01       | 0.09      | 0.84       | 0.51         | 0.00       |
| 4315 | Arginine                | 0.37                  | 0.10       | -0.46           | 0.01       | -0.23             | 0.35       | 0.32      | 0.13       | 0.13     | 0.81       | -0.12    | 0.97       | -0.09    | 0.96       | 0.11     | 0.88       | 0.43     | 0.01       | 0.13      | 0.84       | 0.56         | 0.00       |
| 4740 |                         | 0.14                  | 0.42       | -0.31           | 0.05       | -0.20             | 0.37       | 0.22      | 0.23       | 0.28     | 0.67       | 0.06     | 0.97       | -0.17    | 0.78       | 0.11     | 0.88       | 0.55     | 0.00       | 0.10      | 0.84       | 0.39         | 0.01       |
| 4896 |                         | 0.25                  | 0.19       | -0.37           | 0.03       | -0.28             | 0.34       | 0.24      | 0.20       | 0.24     | 0.67       | 0.00     | 0.98       | -0.18    | 0.78       | -0.01    | 0.98       | 0.38     | 0.01       | -0.02     | 0.95       | 0.50         | 0.00       |
| 5270 | Homo-arginine           | 0.25                  | 0.19       | -0.41           | 0.02       | -0.22             | 0.36       | 0.24      | 0.19       | 0.11     | 0.84       | -0.18    | 0.97       | -0.09    | 0.96       | 0.02     | 0.94       | 0.47     | 0.00       | 0.03      | 0.94       | 0.42         | 0.01       |
| 6369 |                         | 0.23                  | 0.21       | -0.32           | 0.05       | -0.21             | 0.36       | 0.18      | 0.32       | -0.05    | 0.86       | -0.13    | 0.97       | -0.04    | 1.00       | 0.01     | 0.97       | 0.24     | 0.13       | -0.02     | 0.94       | 0.38         | 0.02       |
| 66   |                         | 0.20                  | 0.28       | -0.29           | 0.06       | -0.12             | 0.54       | 0.29      | 0.14       | 0.21     | 0.67       | -0.05    | 0.97       | -0.12    | 0.96       | 0.08     | 0.88       | 0.23     | 0.14       | 0.09      | 0.84       | 0.30         | 0.05       |
| 6672 |                         | 0.35                  | 0.12       | -0.37           | 0.03       | -0.13             | 0.54       | 0.36      | 0.13       | 0.10     | 0.84       | 0.29     | 0.41       | -0.38    | 0.16       | 0.24     | 0.68       | 0.56     | 0.00       | 0.19      | 0.84       | 0.52         | 0.00       |
| 7137 |                         | 0.31                  | 0.14       | -0.39           | 0.02       | -0.24             | 0.34       | 0.36      | 0.13       | 0.11     | 0.84       | -0.07    | 0.97       | -0.17    | 0.78       | 0.14     | 0.88       | 0.43     | 0.01       | 0.14      | 0.84       | 0.56         | 0.00       |
| 781  | Valine                  | 0.35                  | 0.12       | -0.38           | 0.03       | -0.12             | 0.54       | 0.33      | 0.13       | -0.09    | 0.84       | -0.02    | 0.97       | -0.01    | 1.00       | 0.13     | 0.88       | 0.43     | 0.01       | 0.10      | 0.84       | 0.50         | 0.00       |
| 7876 |                         | 0.10                  | 0.52       | -0.32           | 0.05       | -0.25             | 0.34       | 0.25      | 0.18       | 0.17     | 0.67       | -0.05    | 0.97       | -0.05    | 1.00       | 0.12     | 0.88       | 0.33     | 0.03       | 0.17      | 0.84       | 0.35         | 0.03       |
| 858  | Homoserine or Threonine | 0.25                  | 0.19       | -0.43           | 0.02       | -0.31             | 0.34       | 0.30      | 0.14       | 0.08     | 0.84       | 0.08     | 0.97       | -0.21    | 0.78       | 0.22     | 0.68       | 0.45     | 0.00       | 0.20      | 0.84       | 0.51         | 0.00       |
| 867  |                         | 0.29                  | 0.15       | -0.32           | 0.05       | -0.13             | 0.52       | 0.21      | 0.23       | 0.16     | 0.73       | 0.02     | 0.97       | 0.00     | 1.00       | 0.11     | 0.88       | 0.29     | 0.06       | 0.10      | 0.84       | 0.41         | 0.01       |
| 8826 |                         | 0.45                  | 0.10       | -0.54           | 0.00       | -0.17             | 0.43       | 0.32      | 0.13       | 0.15     | 0.73       | 0.00     | 0.98       | 0.01     | 1.00       | 0.17     | 0.87       | 0.33     | 0.04       | 0.19      | 0.84       | 0.53         | 0.00       |
| 9144 |                         | 0.38                  | 0.10       | -0.31           | 0.05       | 0.00              | 0.99       | 0.04      | 0.78       | 0.06     | 0.85       | -0.14    | 0.97       | -0.06    | 1.00       | -0.06    | 0.88       | 0.18     | 0.25       | -0.04     | 0.90       | 0.34         | 0.03       |
| 9539 |                         | 0.12                  | 0.47       | -0.25           | 0.11       | -0.19             | 0.42       | 0.25      | 0.18       | 0.18     | 0.67       | 0.05     | 0.97       | -0.19    | 0.78       | 0.11     | 0.88       | 0.46     | 0.00       | 0.09      | 0.84       | 0.39         | 0.01       |
| 9703 |                         | 0.40                  | 0.10       | -0.46           | 0.01       | -0.19             | 0.42       | 0.32      | 0.13       | 0.08     | 0.84       | 0.05     | 0.97       | 0.00     | 1.00       | 0.08     | 0.88       | 0.38     | 0.01       | 0.10      | 0.84       | 0.51         | 0.00       |

<sup>1</sup>Feature, feature with level 1 and 3 identification; *r*, Spearman correlation coefficient; Features with a significant correlations are indicated in yellow; *FDR*, FDR corrected *p*-value (Benjamini and Hochberg 1995); GLP-1, glucagon-like peptide-1; CRP, C-reactive protein; IL-6, interleukin-6.
